# Supplementary material
Source: PubMed Central journal article supplement (PMC7334530)
Supplement: pnas.2001119117.sapp.pdf [file pnas.2001119117.sapp.pdf]

SUPPLEMENTAL FIGURES for

**Structured clustering of the glycosphingolipid GM1 is required for membrane curvature induced by cholera toxin**

Abir Maarouf Kabbani<sup>1</sup>, Krishnan Raghunathan<sup>2</sup>, Wayne I. Lencer<sup>3</sup>, Anne K. Kenworthy<sup>4,5</sup>, Christopher V. Kelly<sup>1,\*</sup>

<sup>1</sup> Department of Physics and Astronomy, Wayne State University, Detroit, MI USA

<sup>2</sup> Department of Pediatrics Infectious Disease, University of Pittsburgh School of Medicine, Pittsburgh, PA USA

<sup>3</sup> Division of Gastroenterology, Boston Children's Hospital, Boston, MA USA; Department of Pediatrics, Harvard Medical School, Boston, MA USA; Harvard Digestive Diseases Center, Boston, MA USA

<sup>4</sup> Department of Molecular Physiology and Biophysics, Vanderbilt University School of Medicine, Nashville, TN USA

<sup>5</sup> Present address: Center for Membrane and Cell Physiology, University of Virginia School of Medicine, Charlottesville, VA USA

\*Corresponding Author. Email: cvkelly@wayne.edu; Phone: (313) 577-8473.

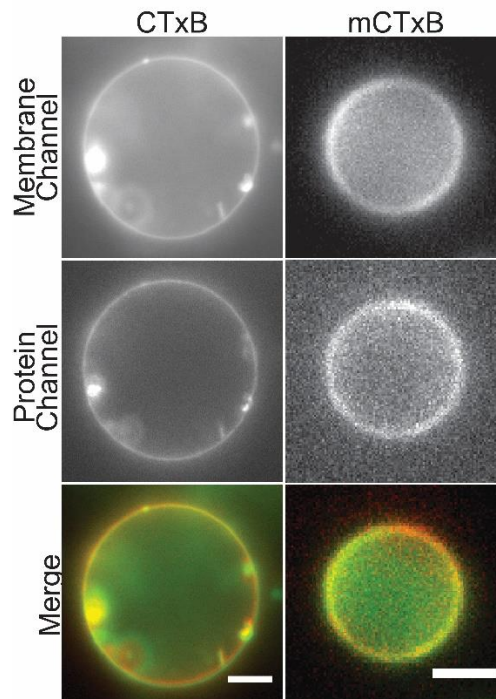

**Figure S1: Binding of CTxB, but not mCTxB, to GUVs induces the formation of tubular invaginations.** GUVs composed of POPC and 0.3 mol% GM1 were labeled with 0.3 mol% DiI or DiD and incubated for 20 min in the presence of either 1.7nM CTxB or 1.7nM mCTxB prior to imaging with wide-field fluorescence microscopy. Scale bars, 5  $\mu$ m.

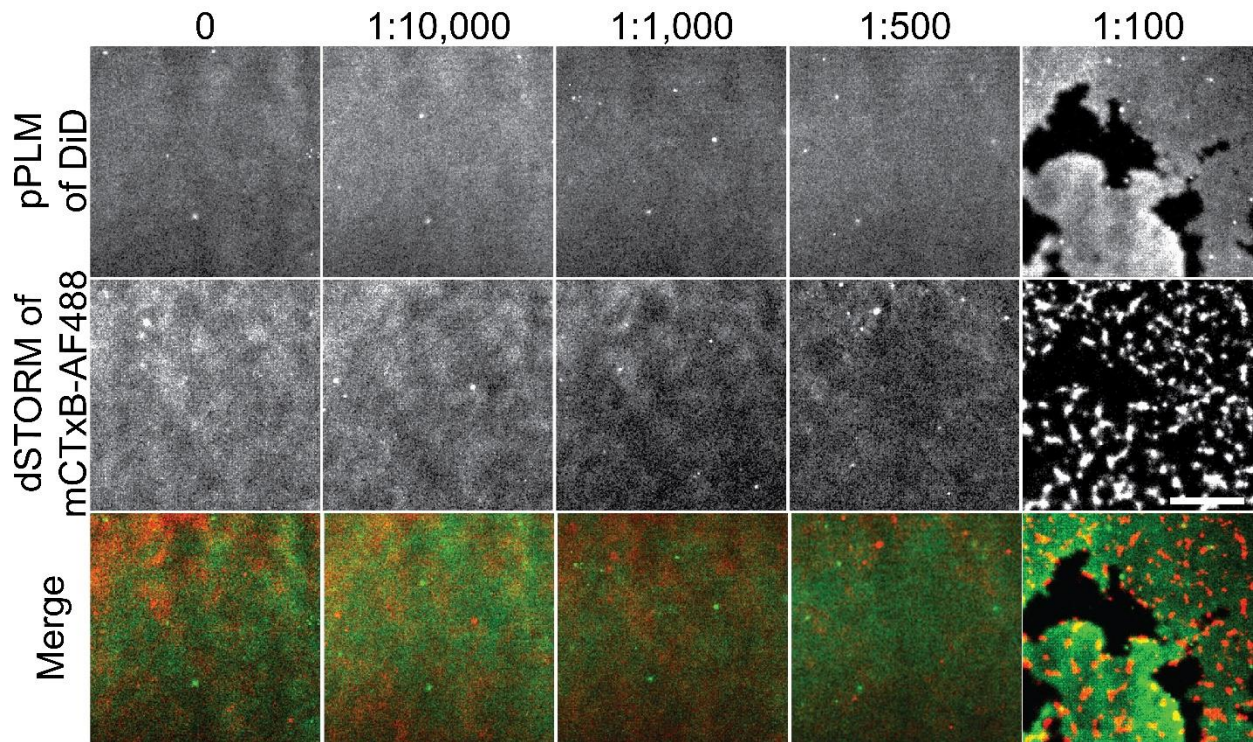

**Figure S2: Antibody-induced crosslinking of mCTxB fails to induce membrane budding.** Planar lipid bilayers containing 0.3 mol% GM1 were labeled with 8.6 nM mCTxB followed by either buffer alone or buffer containing the indicated dilutions of anti-CTxB antibody. They were subsequently imaged by pPLM (A-E) and dSTORM (D-F). Note that the clustering of the mCTxB was readily observed at an anti-CTxB dilution at 1:100 (J). Despite this, no membrane bending was detected under these conditions, although the edge of the supported bilayer was readily apparent (*black area*) (E). Scale bar, 2  $\mu\text{m}$ .

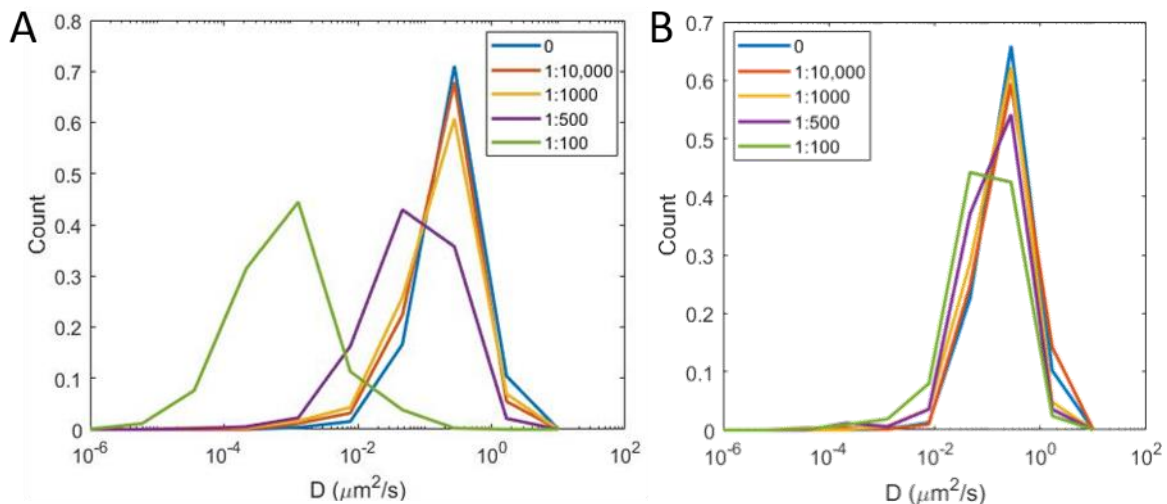

**Figure S3: The diffusion of mCTxB, but not DiI, is slowed in the presence of increasing concentrations of anti-CTxB antibody.** Histograms show the distribution of diffusion coefficients measured by single-particle tracking in planar supported lipid bilayers for mCTxB (A) or DiI (B) as a function of the indicated dilution of anti-CTxB antibody.

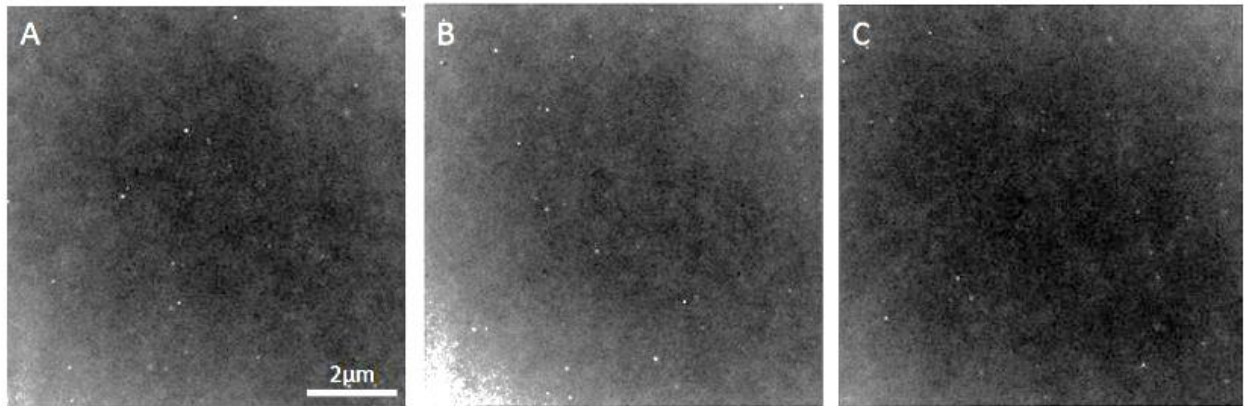

**Figure S4: Generic crosslinking of lipids does not induce membrane budding.** Planar POPC SLBs containing either (A) 0.3 mol%, (B) 1 mol%, or (C) 3 mol% DPPE-Biotin were labeled with 4.3 nM streptavidin 90 min prior to imaging via pPLM. Scale bar, 2  $\mu\text{m}$ .

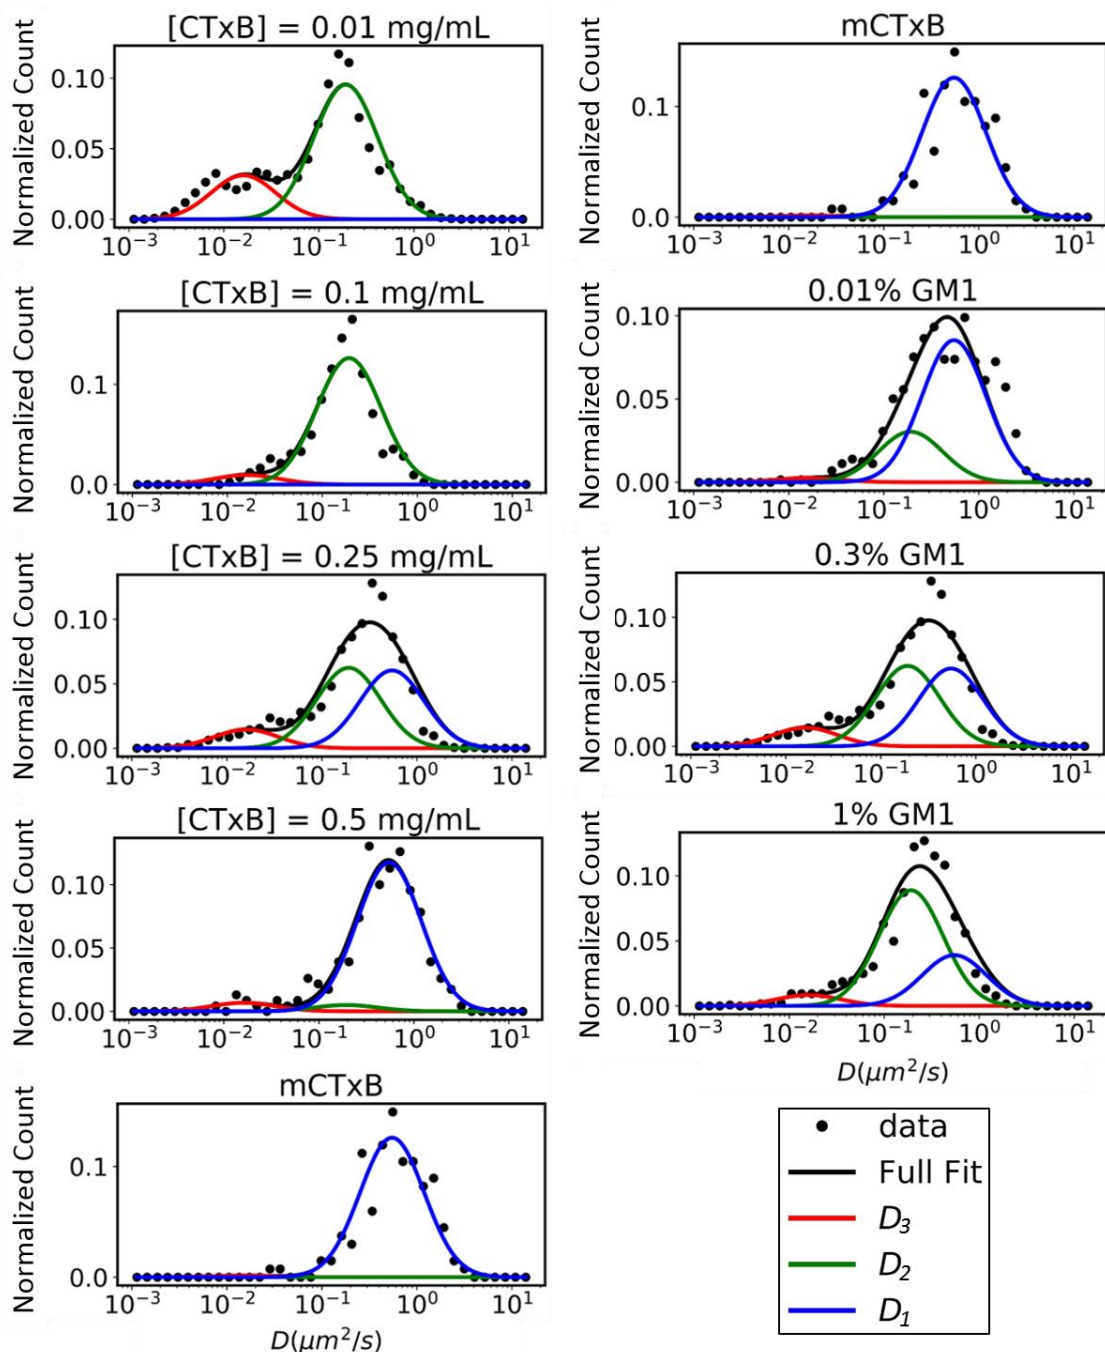

**Figure S5: Fits to histograms of  $D$  for CTxB reveal three distinct subpopulations of diffusing species with different  $D$  values, whereas the histogram for mCTxB is consistent with the presence of a single population.** Each histogram of  $D$  was fit to Eq. 1 (black line), allowing the amplitude of each fitting parameters to vary across experiments. The  $D$  values corresponding to each subpopulation ( $D_1$ ,  $D_2$ , and  $D_3$ ) were held constant for all experimental fits. Note that the plot for mCTxB is shown in both columns to allow for better comparison across experimental conditions.

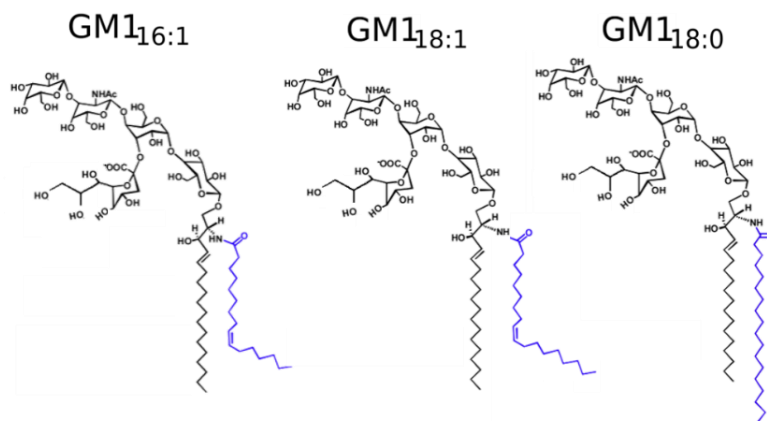

**Figure S6: Chemical structure of custom-made GM1<sub>16:1</sub>, GM1<sub>18:1</sub>, and GM1<sub>18:0</sub> (32).** Note that commercially available ovine GM1 is predominantly composed of GM1<sub>18:0</sub>.

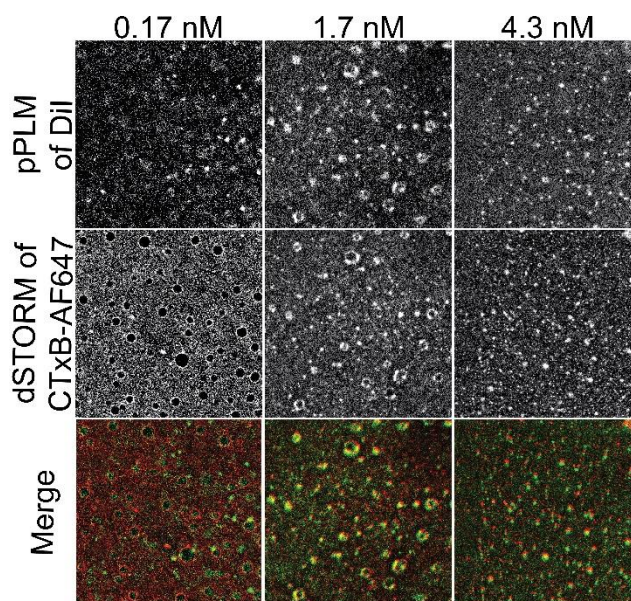

**Figure S7: Increasing the ratio of GM1 to CTxB results in increased membrane curvature in model membranes containing cholesterol.** The GM1:CTxB ratio was altered by labeling planar supported bilayers containing 0.3 mol% GM1 and 30 mol% cholesterol with either 0.17 nM, 1.7 nM, or 4.3 nM CTxB. Samples were then imaged by pPLM and dSTORM. Merged images show areas where clustered CTxB (*red*) colocalizes with sites of induced curvature (*green*). The presence of cholesterol had no significant effect on the membrane curvature created by CTxB. Scale bar, 2  $\mu$ m.

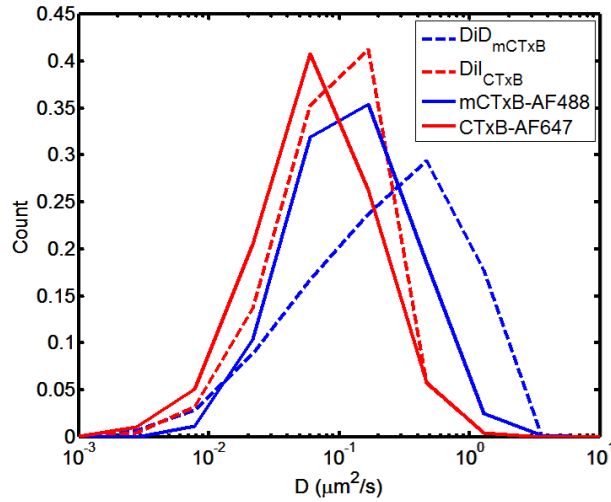

**Figure S8: CTxB diffuses more slowly than mCTxB on live cells.** Histograms of single-molecule diffusion coefficients obtained in live COS-7 cells are shown for CTxB, mCTxB, and DiI or DiD in the presence of CTxB or mCTxB, respectively.

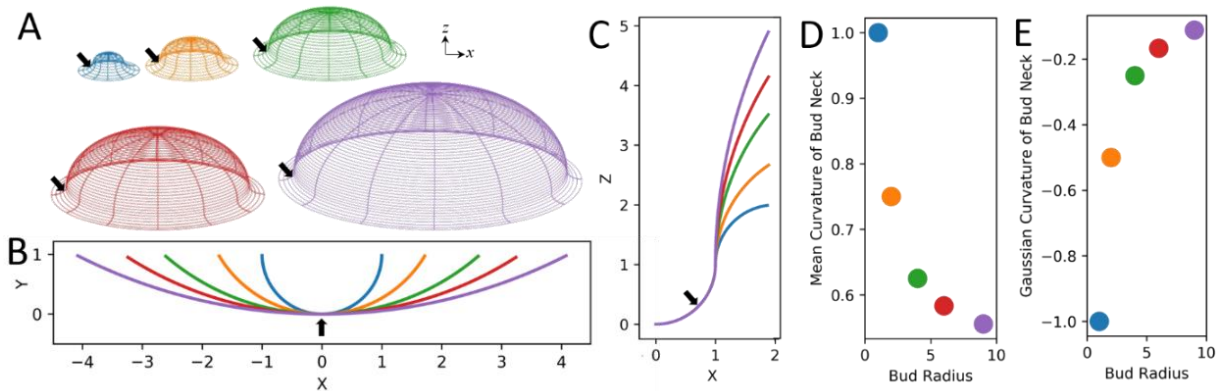

**Figure S9: The necks of membrane buds provide one dimension of negative curvature.** A model of the membrane buds of increasing radii are shown (A). The bud necks are highlighted (*black arrows*). The decreasing positive curvature in the X-Y plane (B) and consistently negative curvature in the X-Z plane (C) results in the mean curvature at the bud neck decreasing as the bud radius grows (D). In contrast, the Gaussian curvature increases to zero as a function of increasing bud radius (E). Additionally, a larger membrane bud would provide more membrane area on the neck to accommodate more CTxB.
